# Supplementary material
Source: publisher site journal article supplement (http://kjim.org/upload/media/kjim-2022-249_suppl10.pdf)
Supplement: Supplementary file 1 [file kjim-2022-249_suppl10.pdf]

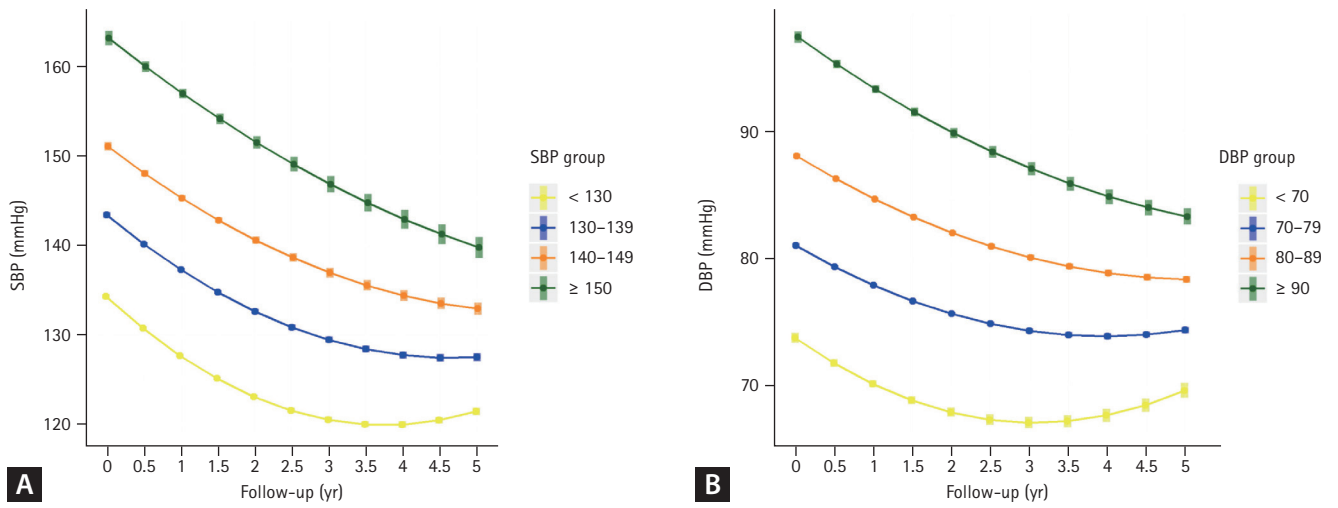

**Supplementary Figure 2.** Blood pressure changes during follow-up. (A) Systolic blood pressure (SBP). (B) Diastolic blood pressure (DBP).
